# Supplementary material for: Theoretical Studies and Photovoltaic Performance of 1,10- Phenanthroline Derivative Compound as a Multiple Anchor Group
Source: Research Square preprint supplement (doi:10.21203/rs.3.rs-8128370/v1), 2025-11-28
Supplement: Supplementary file 1 [file befc6af68ddc245799d9d48e.docx]

**SUPPLEMANTARY INFORMATION**

**Theoretical Information**

Reactivities of molecules can be determined global reactivity parameters. According to Koopman’s Theorem, the energies of highest occupied molecular orbital (EHOMO) and lowest unoccupied molecular orbital (ELUMO) are used to calculate the chemical potential and hardness reactivity parameters. The electrophilicity index, ω introduced by Parr and it was calculated by using the chemical potential and hardness [1,2]. Softness has a inverse relationship with hardness value. Using the following relations the properties such as Chemical potential (μ), Electrophilicity index (ω), Global hardness (η), and Softness (S) are calculated [1,2]

(1)

(2)

(3)

(4)

Light harvesting efficiency (LHE) is used parameter in order to discuss suitability of a compound use as a DSSC [3, 4]. The optical stability of a compound is determined by using the excited state lifetime (τ) factor [5]. LHE and the excited lifetime can be calculated as follows:

(5)

(6)

In these equations is the oscillator strength and Eex is excitation energy. Power conversion efficiency of a compound rlies on injection driving force (ΔGinj) which is the injection of electrons into the semiconductor’s conduction bond from the excited state of dye. Moreover driving force of dye regeneration (ΔGreg) is meaning of the ability of an oxidized compound to recover electrons from electrolyte after photoexcitation In order to get high efficiency from a compound as a DSSC both ΔGinj andΔGreg should be negative value. ΔGinj andΔGreg can be calculated as follows:

(7)

(8)

where is the oxidation potential of a compound as a dye in the exicited state, is the experimentally determined conduction bond energy of TiO2 (usually -4.00 eV) and redox potential of electrolyte. can be determined as [4, 6, 7]:

(9)

where is the oxidation potential of a compound that equals the negative value of HOMO and is the excitation energy [4, 7].

**Scheme SI.1** Synthesis scheme of A1-Br2 and A1 compound

**Scheme SI. 2** Synthesis scheme of compound A3

**Scheme SI. 3** Synthesis scheme of compound B1

**Scheme SI.4** Synthesis scheme of compound B3

**
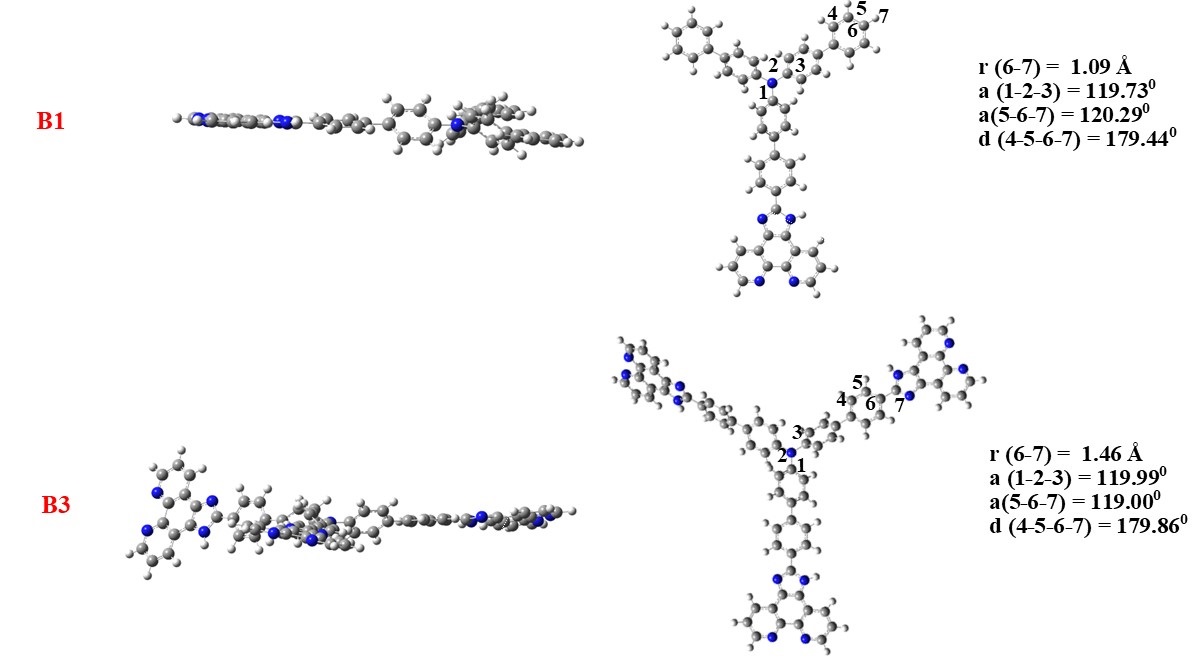
**

**Figure SI.1** Optimized Geometries of B1 and B3


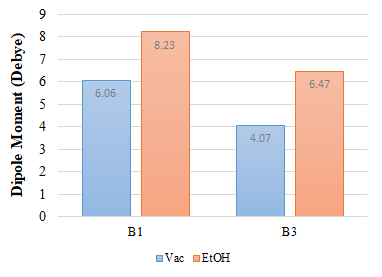


**Figure SI.2** Changing of Dipole Moments of B1 and B3 for different phases

**
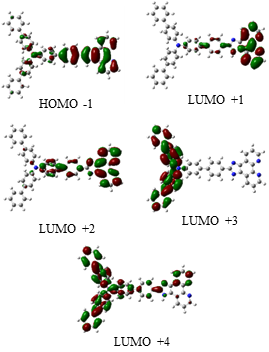
**

**Figure SI.3** Molecular orbitals of **B1** from HOMO-1 to LUMO+4

**
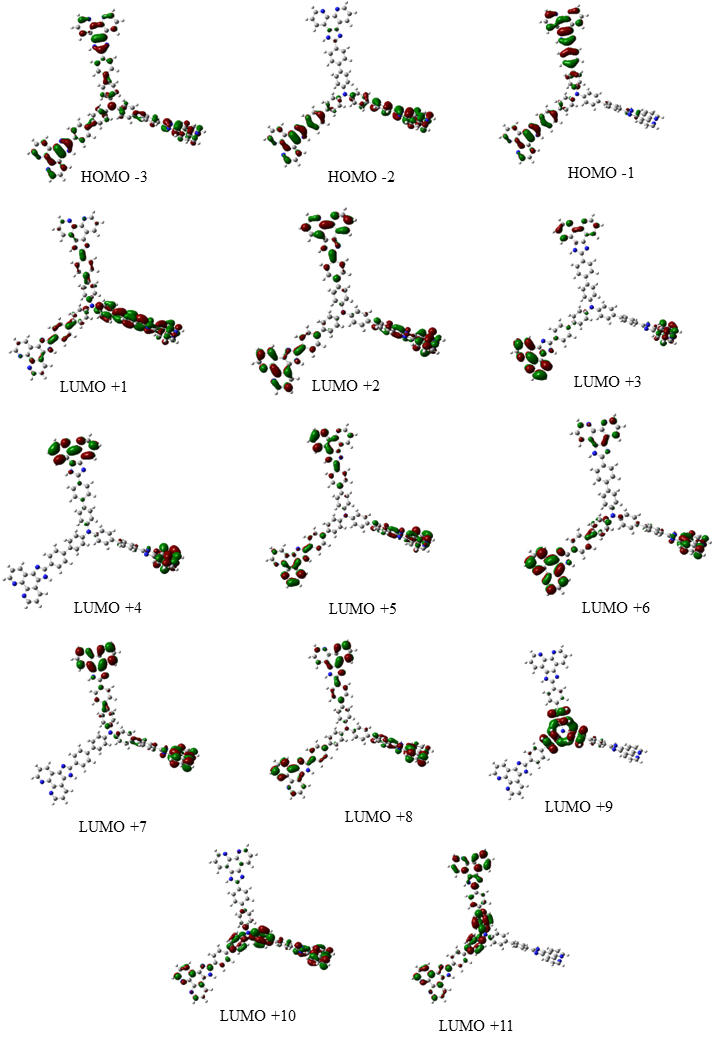
**

**Figure SI.4** Molecular orbitals of **B3** from HOMO-3 to LUMO+11


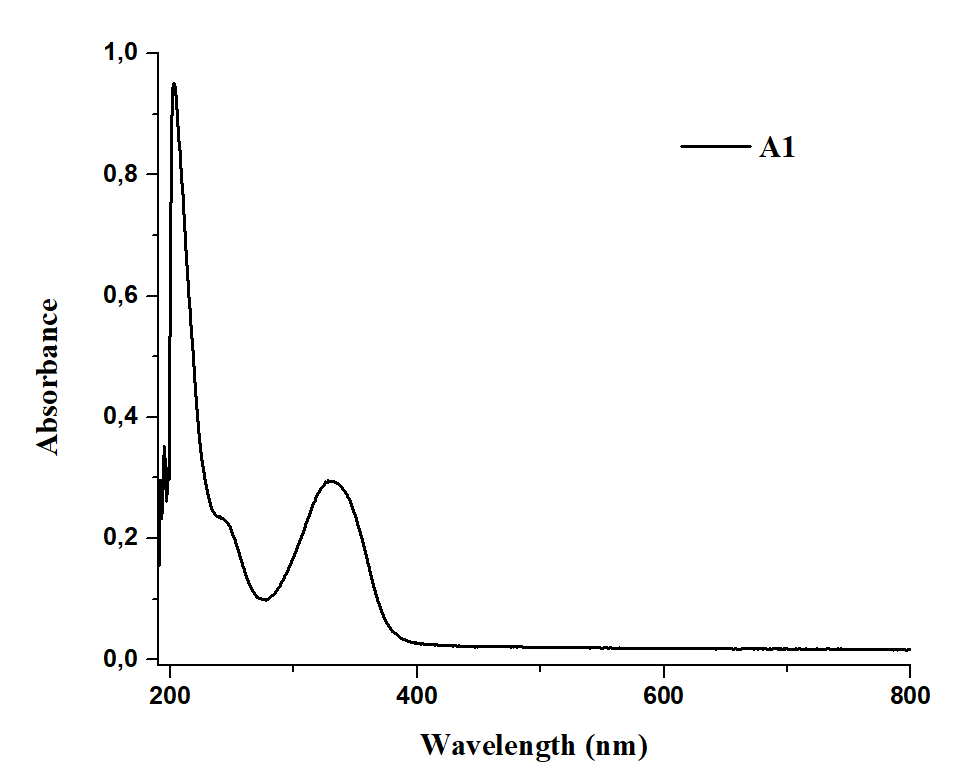


**Figure SI.5** UV-Visible spectrum of compound A1


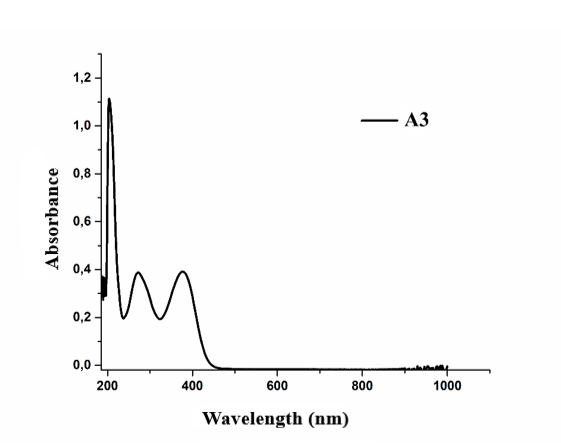


**Figure SI.6** UV-Visible spectrum of compound A3


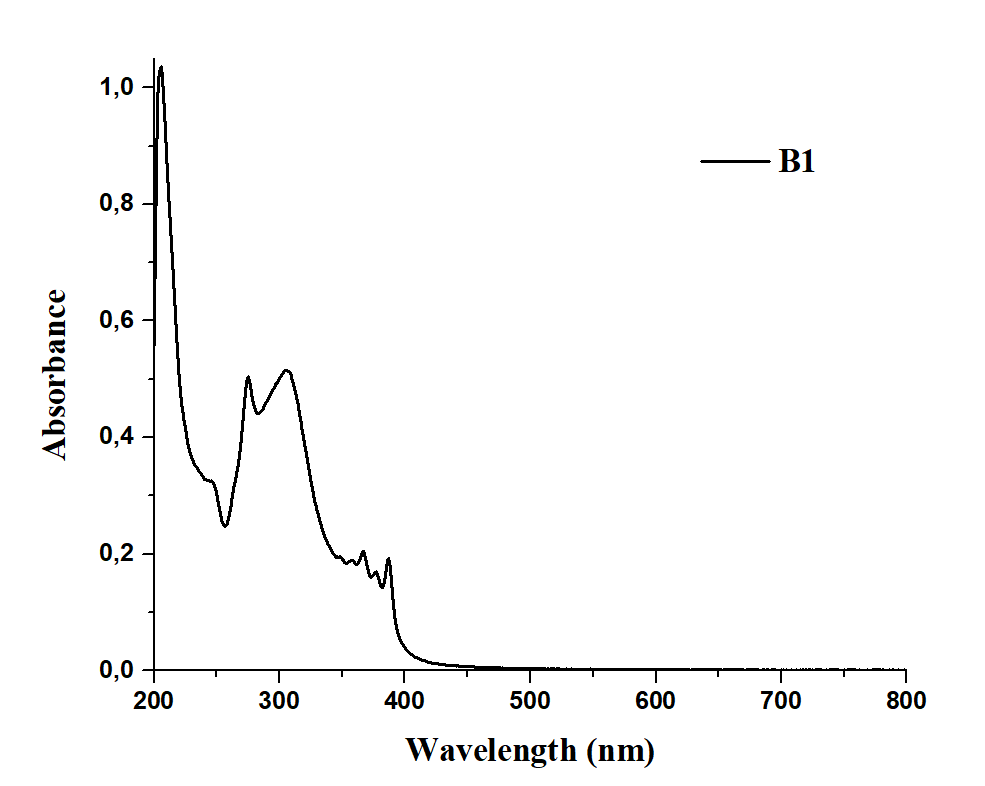


**Figure SI.7** UV-Visible spectrum of compound B1


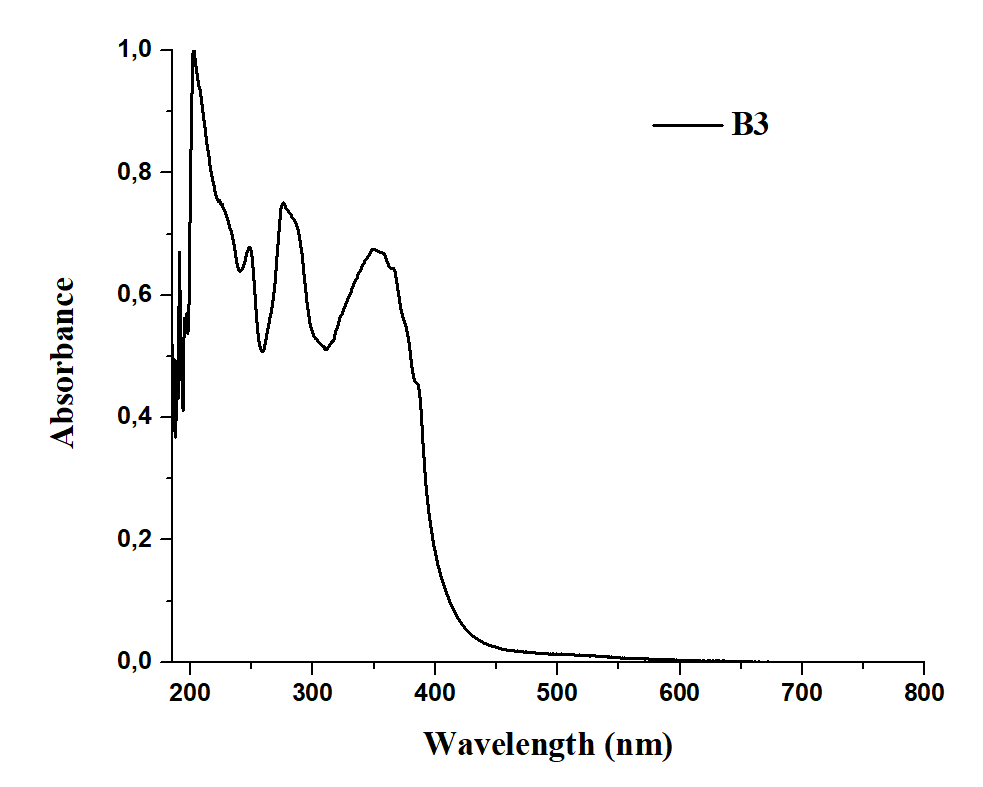


**Figure SI.8** UV-Visible spectrum of compound B3


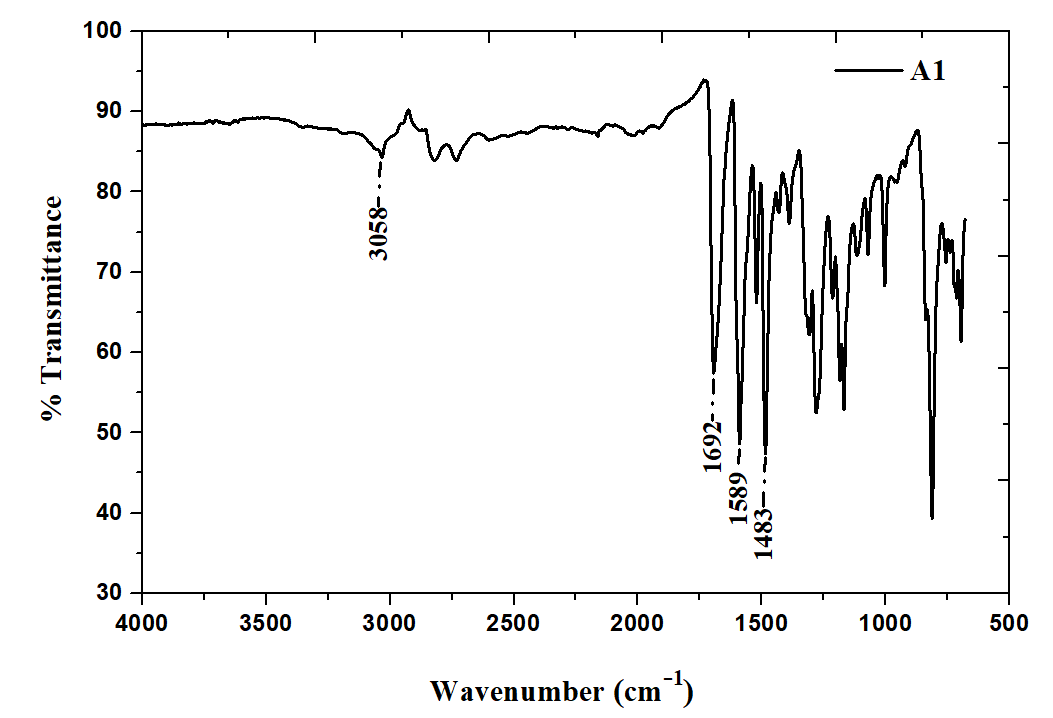


**Figure SI.9** FTIR spectrum of compound A1


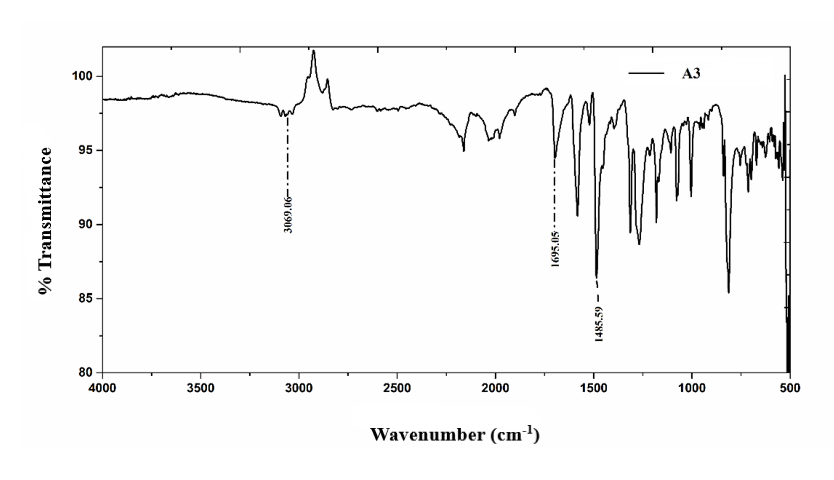


**Figure SI.10** FTIR spectrum of compound A3


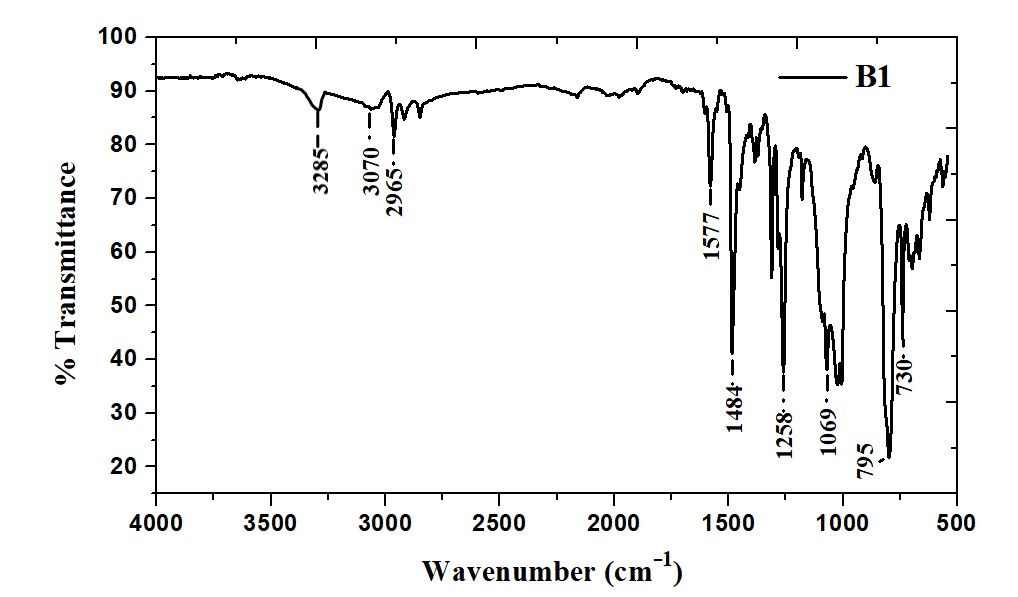


**Figure SI.11** FTIR spectrum of compound B1


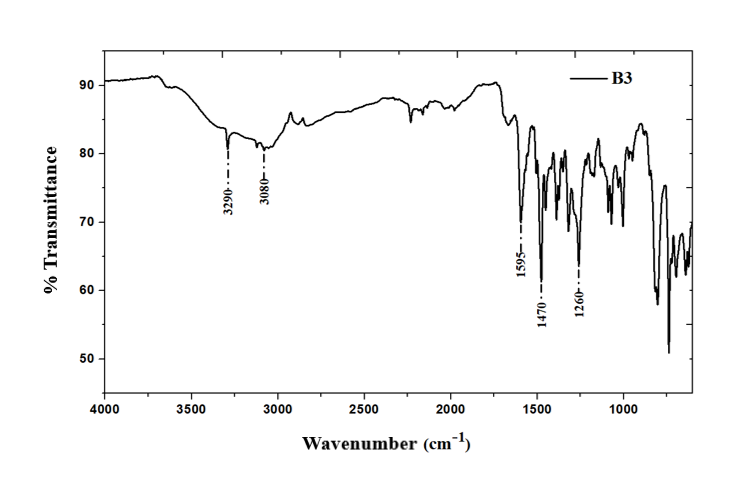


**Figure SI.12** FTIR spectrum of compound B3

**Table SI.1** Calculated IR Results of Compounds

|  | B1 | | B3 | |
| --- | --- | --- | --- | --- |
|  | Calculated  (cm-1) | Experimental  (cm-1) | Calculated  (cm-1) | Experimental  (cm-1) |
| γC-H (benzene) | 3059.30 | 3070 | 3079.73 | 3080 |
| γN-H (imidazole) | 3526.45 | 3285 | 3526.99 | 3290 |
| γC=N | 1492.80 | 1577 | 1493.47 | 1595 |
| γC=C | 1508.91 | 1484 | 1518.75 | 1470 |

**Table SI.2** Calculated NMR Results of Compounds

|  | B1 |  | B3 | |
| --- | --- | --- | --- | --- |
|  | Calculated  (ppm) | Experimental  (ppm) | Calculated  (ppm) | Experimental  (ppm) |
| Himidazole | 9.41 | 8.95 | 9.49- 9.46 | 9.67 |


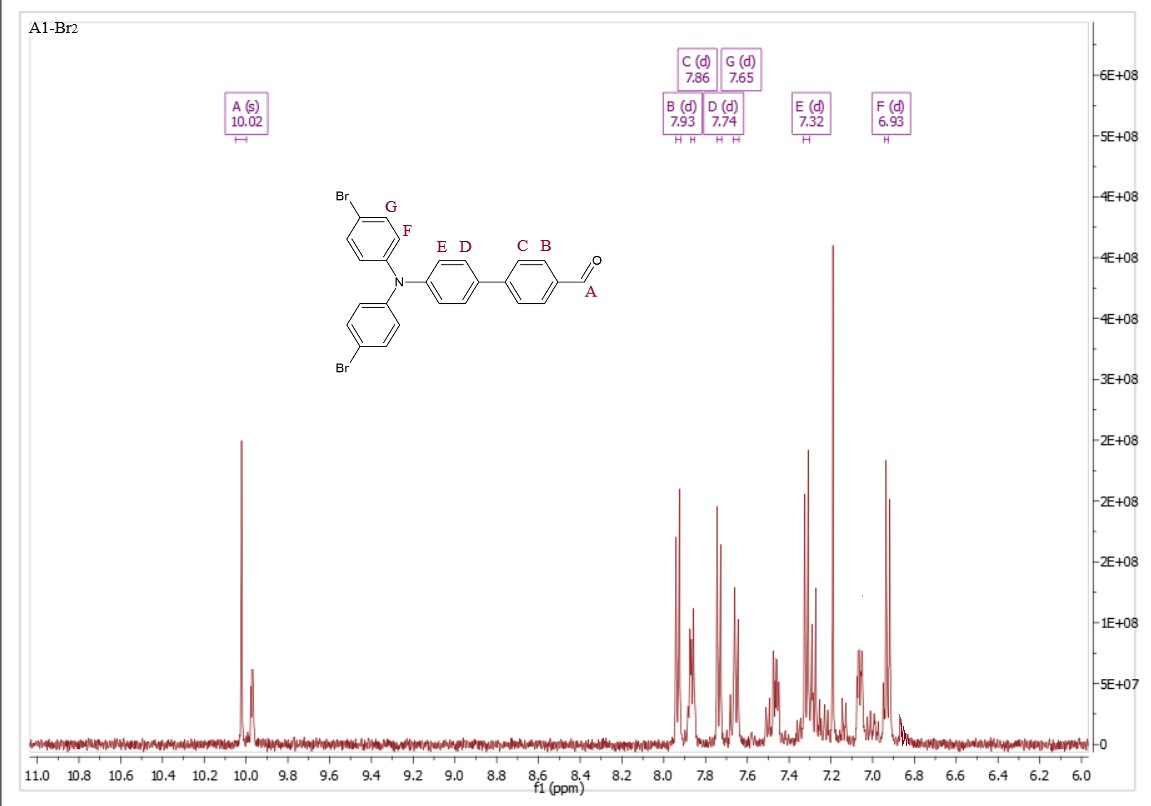


**Figure SI.13** 1H-NMR spectrum of A1-Br2 compound


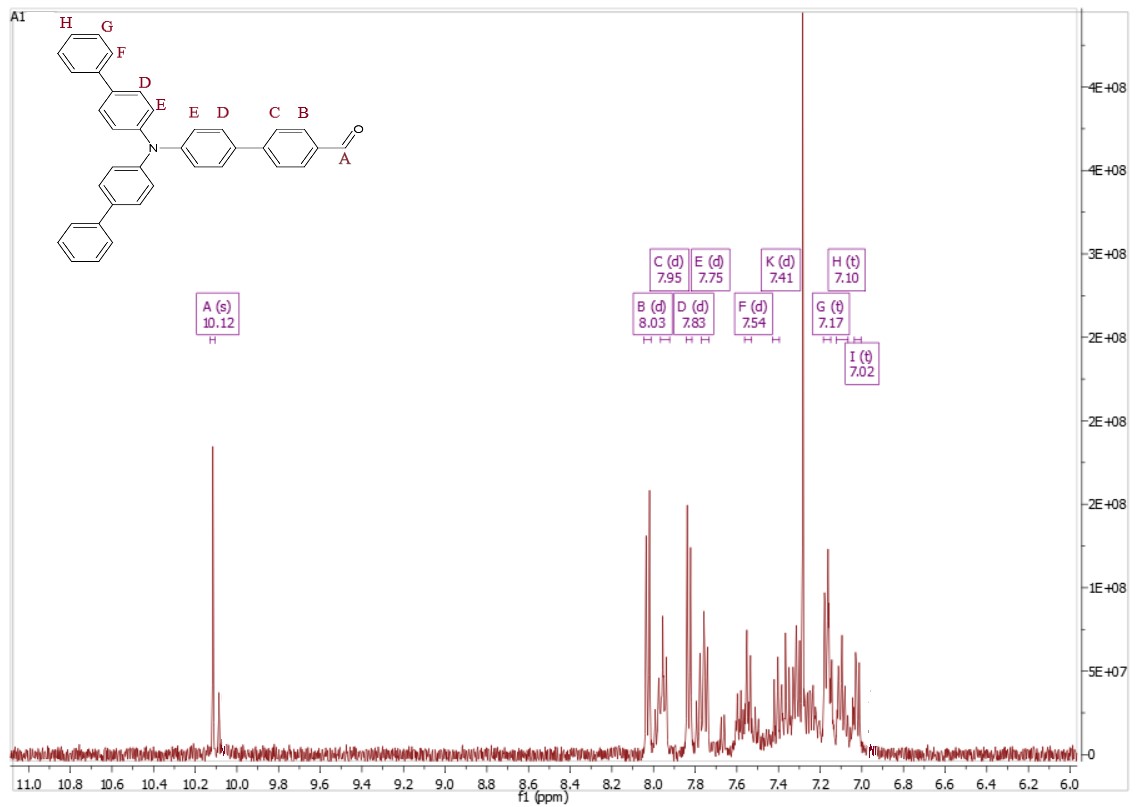


**Figure SI.14** 1H-NMR spectrum of A1 compound


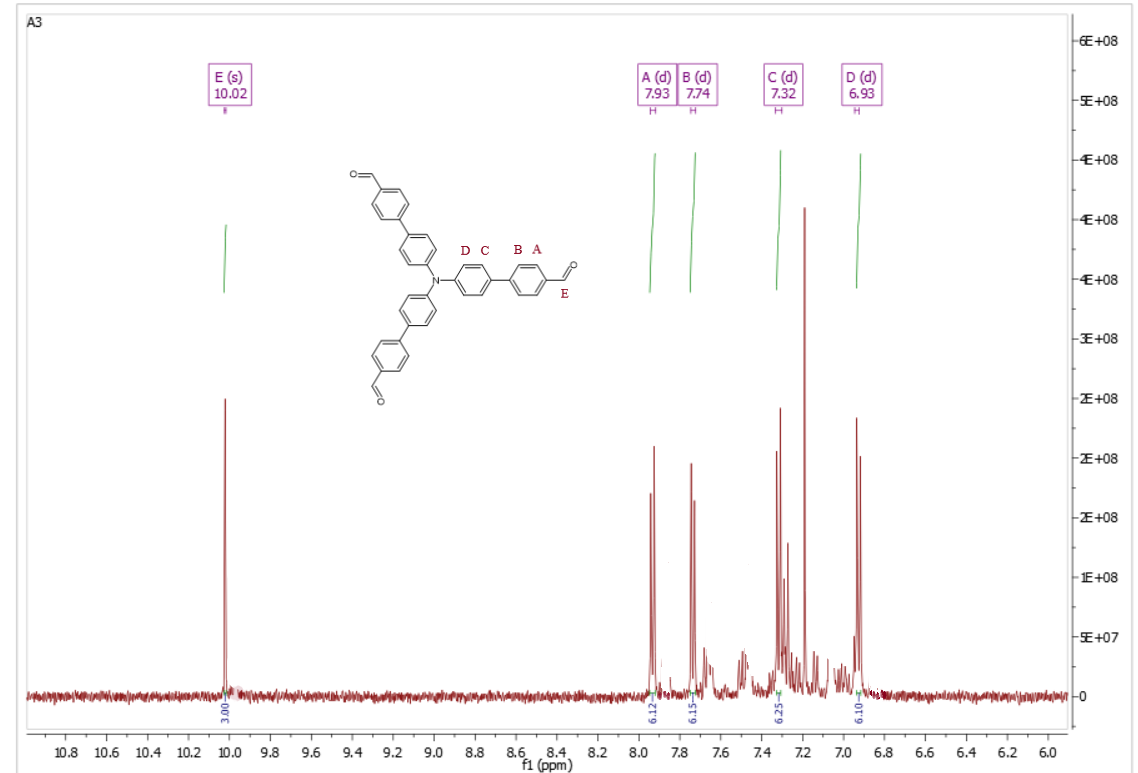


**Figure SI.15** 1H-NMR spectrum of A3 compound


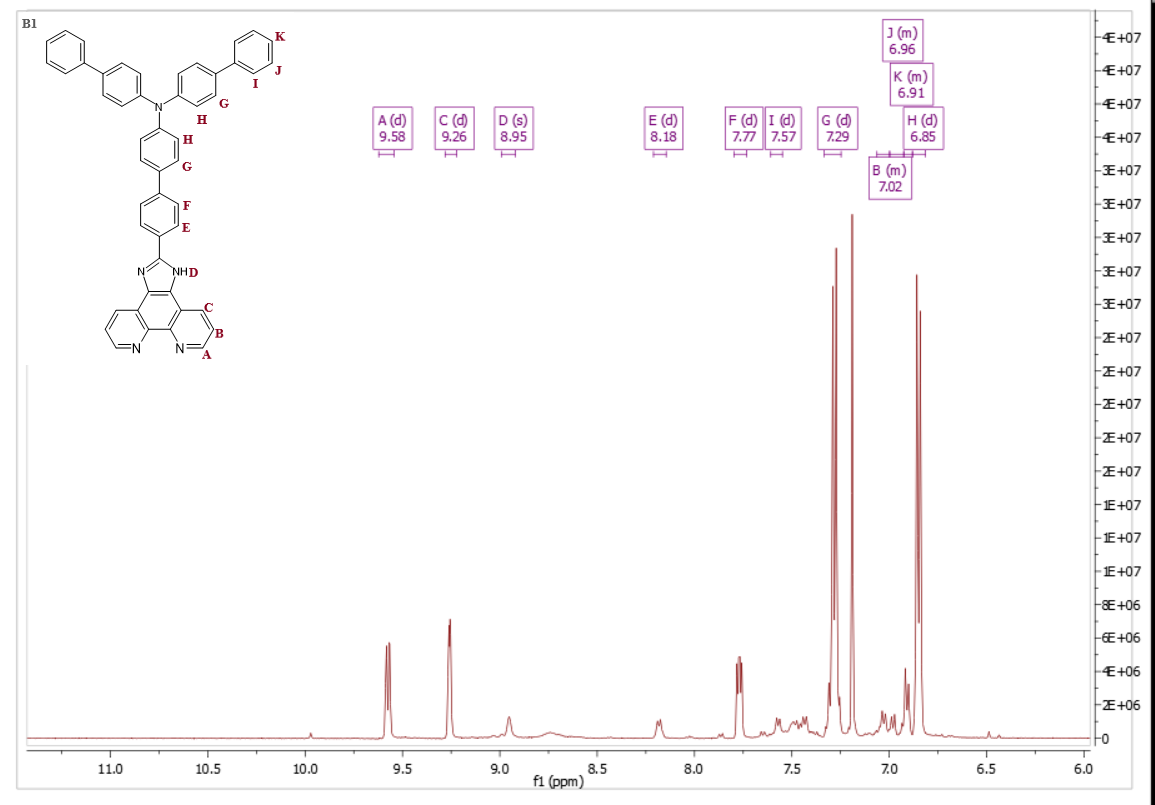


**Figure SI.16** 1H-NMR spectrum of B1 compound


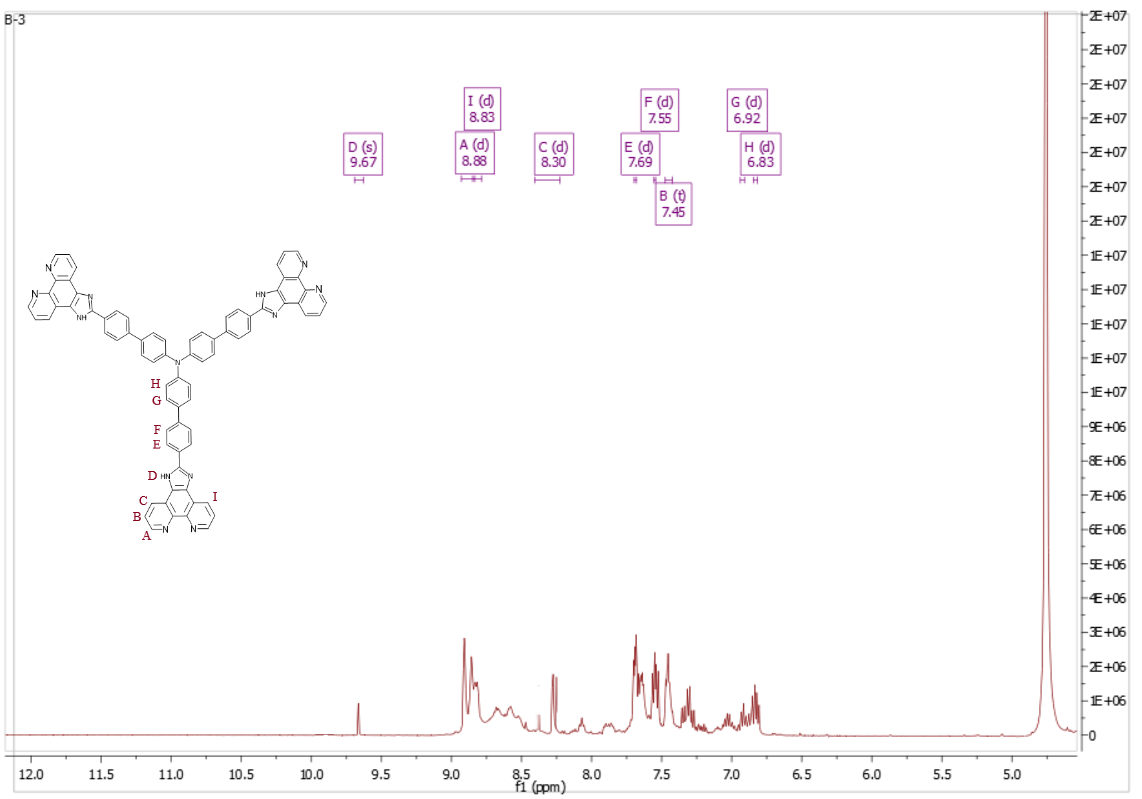


**Figure SI.17** 1H-NMR spectrum of B3 compound


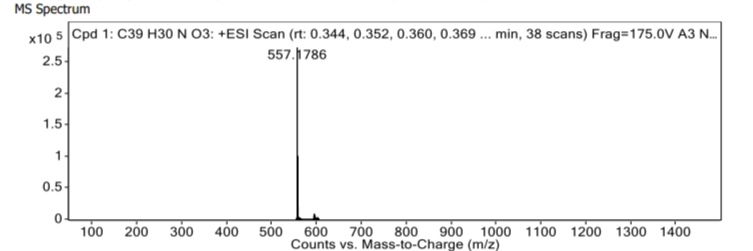


**Figure SI.18** Q-Tof result of compound A3, Q-TOF ESI MS m/z [M+]: 557.18 g/mol

**Figure SI.19** MALDI TOF spectrum of compound B1, MALDI-TOF [M+1]+5H 697


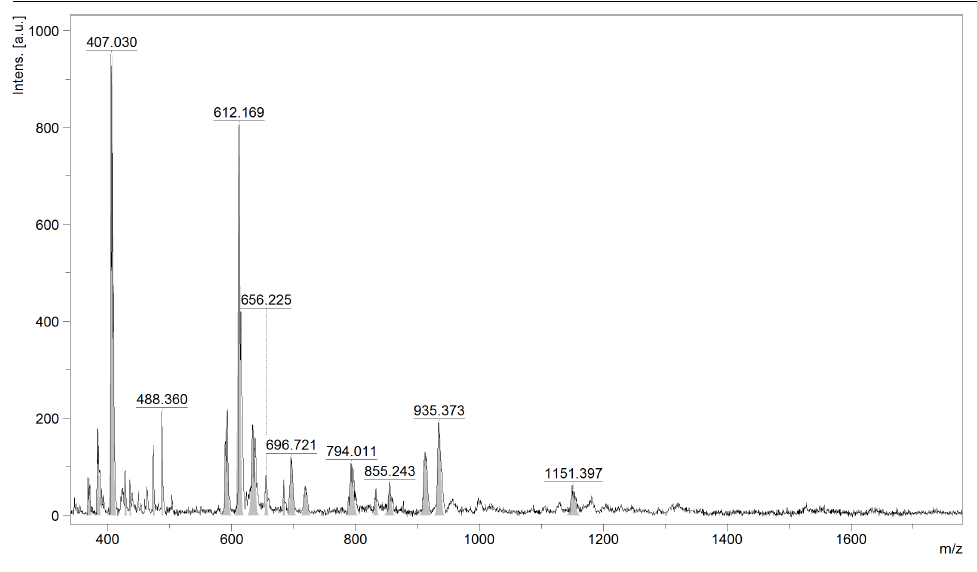


**Figure SI.20** MALDI TOF spectrum of compound B3, MALDI-TOF [M+1]Na+ 1151

**REFERENCES**

[1] Domingo LR, Pérez P (2011) *Org. Biomol. Chem.* *9*:7168.

[2] Geerlings P, De Proft F, Langenaeker W (2003) *Chem. Rev.* *103*:1793–1874.

[3] Samiee S, Hossienpour P (2019) *Inorg. Chim. Acta* *494*:13–20.

[4] Britel O, Fitri A, Benjelloun AT, Benzakour M, Mcharfi M (2023) *Struct. Chem.* *34*:1827–1842.

[5] Yüzer AC, Kurtay G, Ince T, Yurtdaş S, Harputlu E, Ocakoğlu K, Güllü M, Tozlu C, Ince M (2021) *Mater. Sci. Semicond. Process.* *129*:105777.

[6] Sekkat Y, Fitri A, Britel O, Benjelloun AT, Mcharfi M, Benzakour M (2024) *ChemistrySelect* *9*, e202403042.

[7] Wang S, Yu Z, Li L, Qiao J (2023) *J. Mol. Graph. Model.* 108677.
